# Supplementary material for: Cathodic ALD V2O5 thin films for high-rate electrochemical energy storage
Source: Royal Society of Chemistry journal article supplement (doi:10.1039/c3ra23031g), 2013-01-01
Supplement: c3ra23031g.pdf [file c3ra23031g.pdf]

## Cathodic ALD $V_2O_5$ Thin Films for High-Rate Electrochemical Energy Storage

Xinyi Chen,<sup>1,2</sup> Ekaterina Pomerantseva,<sup>2,3</sup> Keith Gregorczyk,<sup>1,2</sup> Reza Ghodssi,<sup>2,3</sup> and Gary Rubloff<sup>1,2\*</sup>

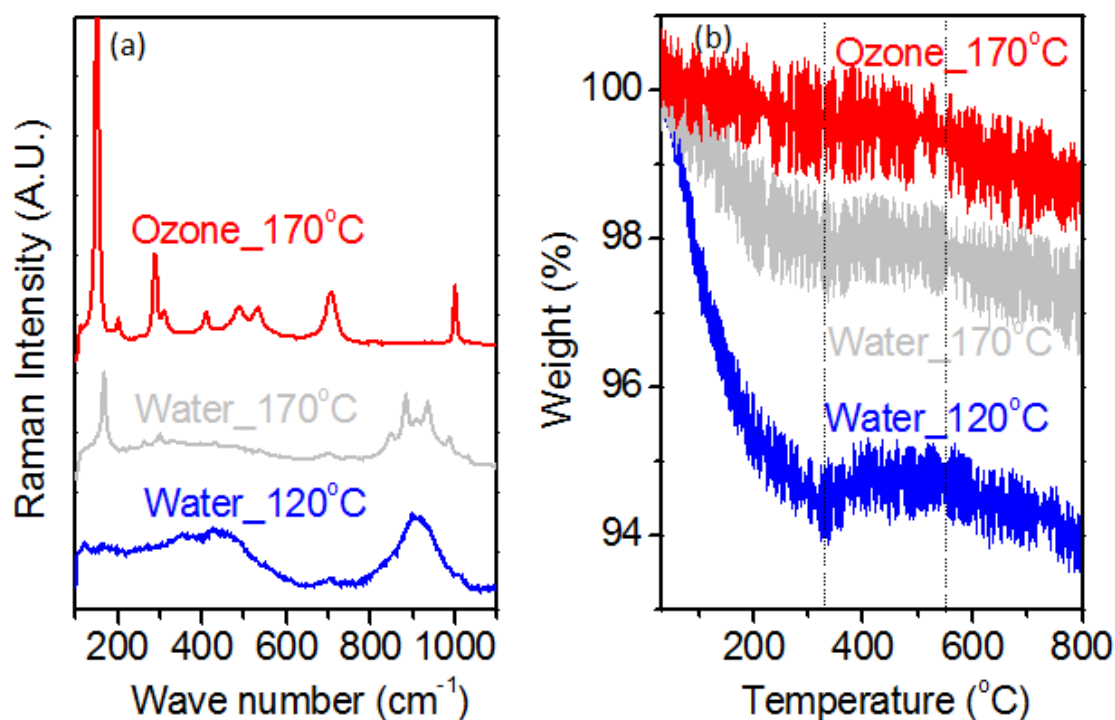

Figure 1s: (a) Raman scattering spectrum of ALD  $V_2O_5$  films on stainless steel disk. Only the film deposited at 170 °C with  $O_3$  as oxidant presents characteristic peaks of crystalline  $V_2O_5$ , marked in the Figure. Raman spectroscopy was performed with a Horiba Jobin-Yvon LabRAM HR-VIS MicroRaman system using a 632.8nm laser source. (b) TGA curves of  $V_2O_5$  films. The  $O_3$ -based films deposited at 170 °C showed lowest mass loss, due to least residual water in the film. TGA was carried out in a TA instruments TGA Q500. The samples for TGA were deposited in Whatman Anodic alumina template (AAO) template to increase  $V_2O_5$ /substrate mass ratio. The baseline curve from AAO was subtracted to present that of  $V_2O_5$  only, shown in (b).

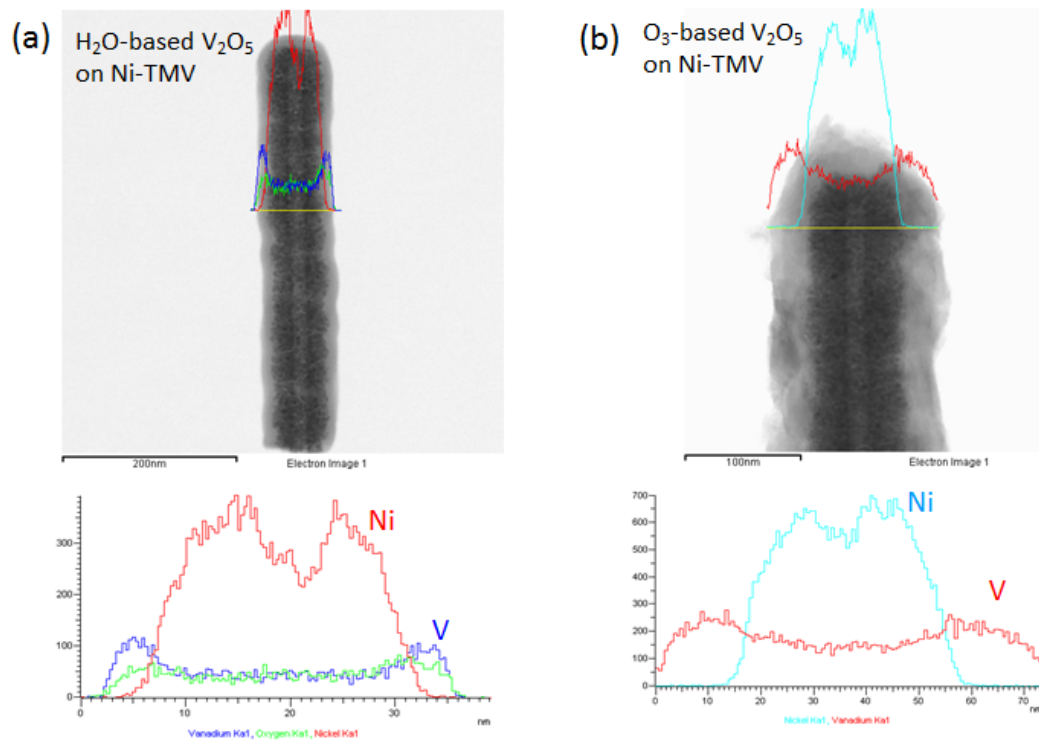

Figure 2s: EDS analysis of V<sub>2</sub>O<sub>5</sub> coated Ni-TMV nanowires for determining V<sub>2</sub>O<sub>5</sub> layer marked in Figure 3a and b.
